# Supplementary material
Source: publisher site journal article supplement (https://www.dovepress.com/article/611427)
Supplement: Supplementary file 1 [file 611427%20Revised%20Supplementary%20material.pdf]

## Supplementary Figure 1

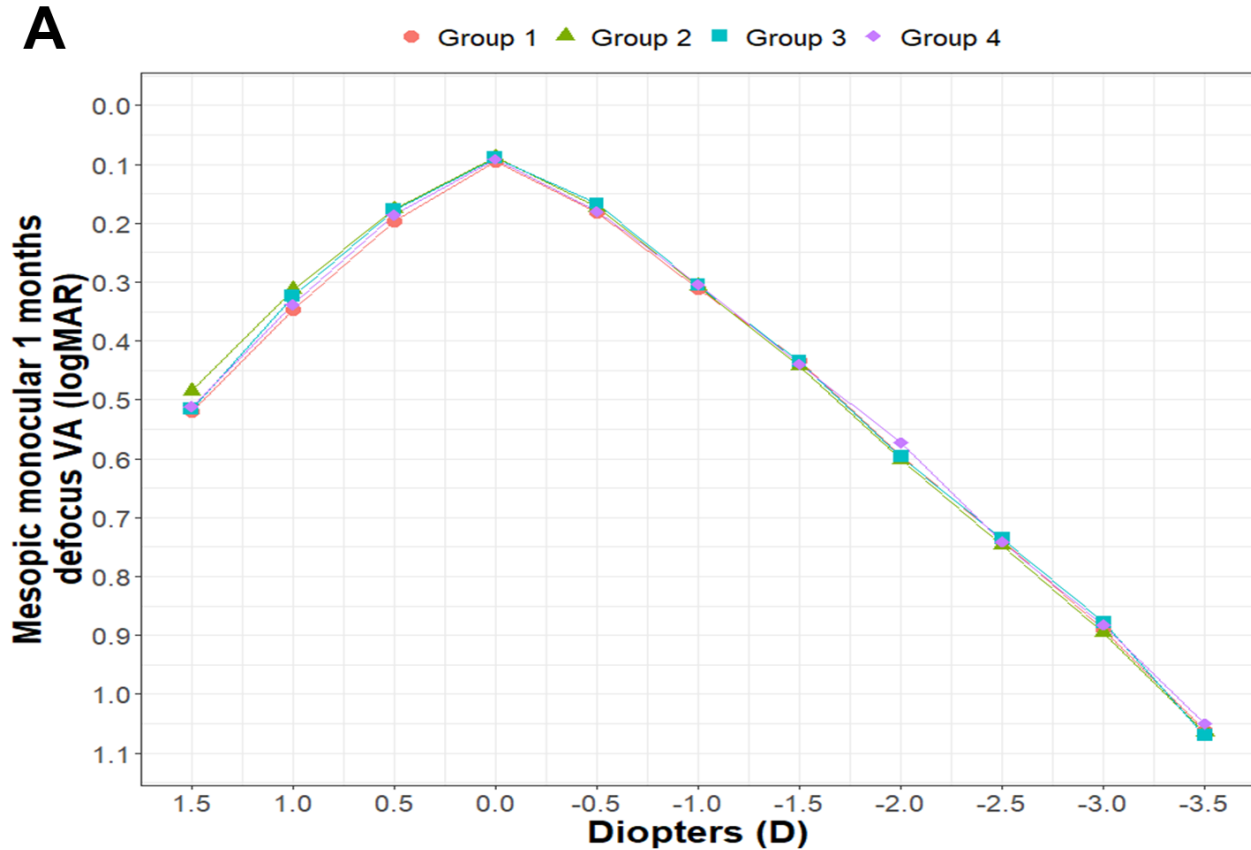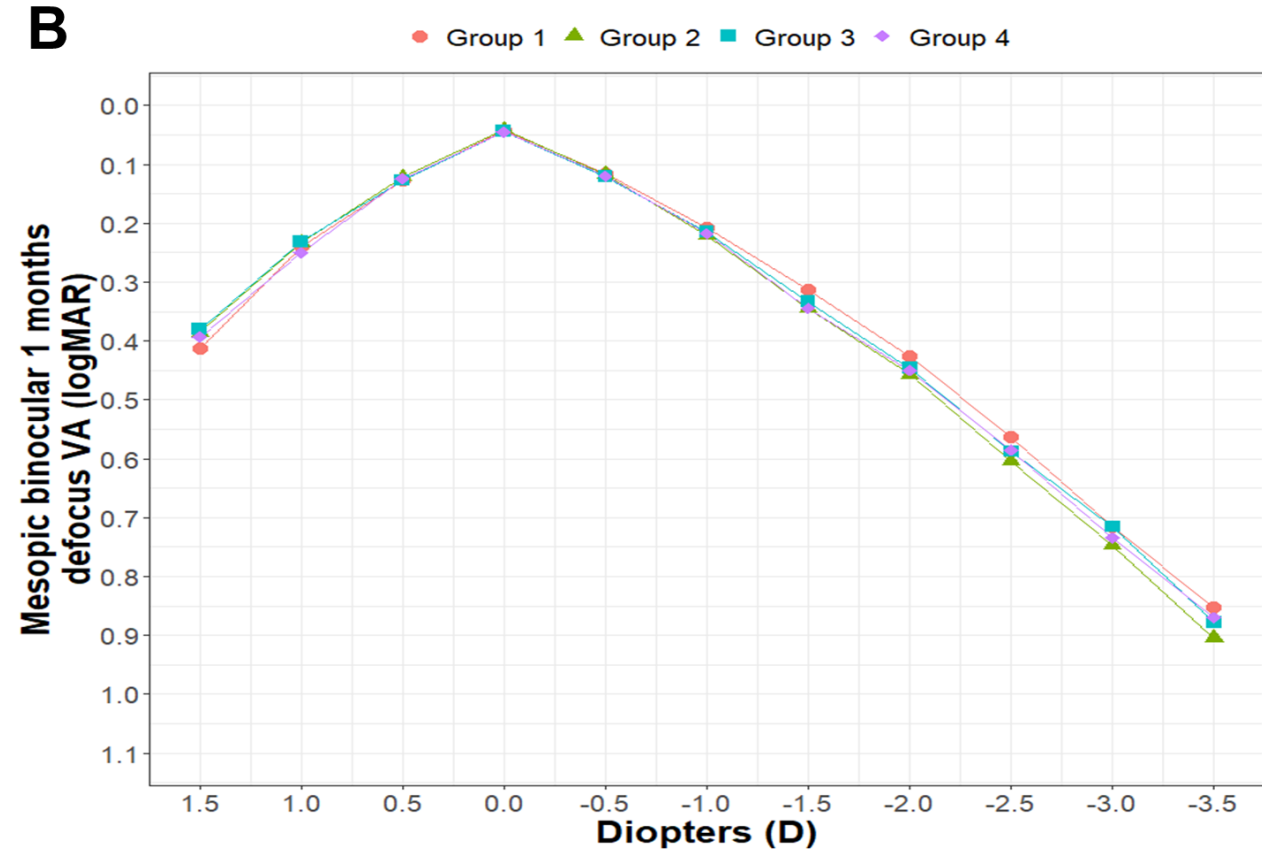

**Supplementary Figure 1. Mesopic defocus curves at 1 month post-surgery.** Mean monocular (left) and binocular (right) mesopic defocus curves at 1 month. Group 1 (<20.0 D), Group 2 (20.0–21.5 D), Group 3 (22.0–23.5 D), and Group 4 ( $\geq 24.0$  D). No significant inter-group differences were observed at most defocus levels ( $p > 0.05$  by generalized estimating equations [GEE]). D, diopters.

## Supplementary Figure 2

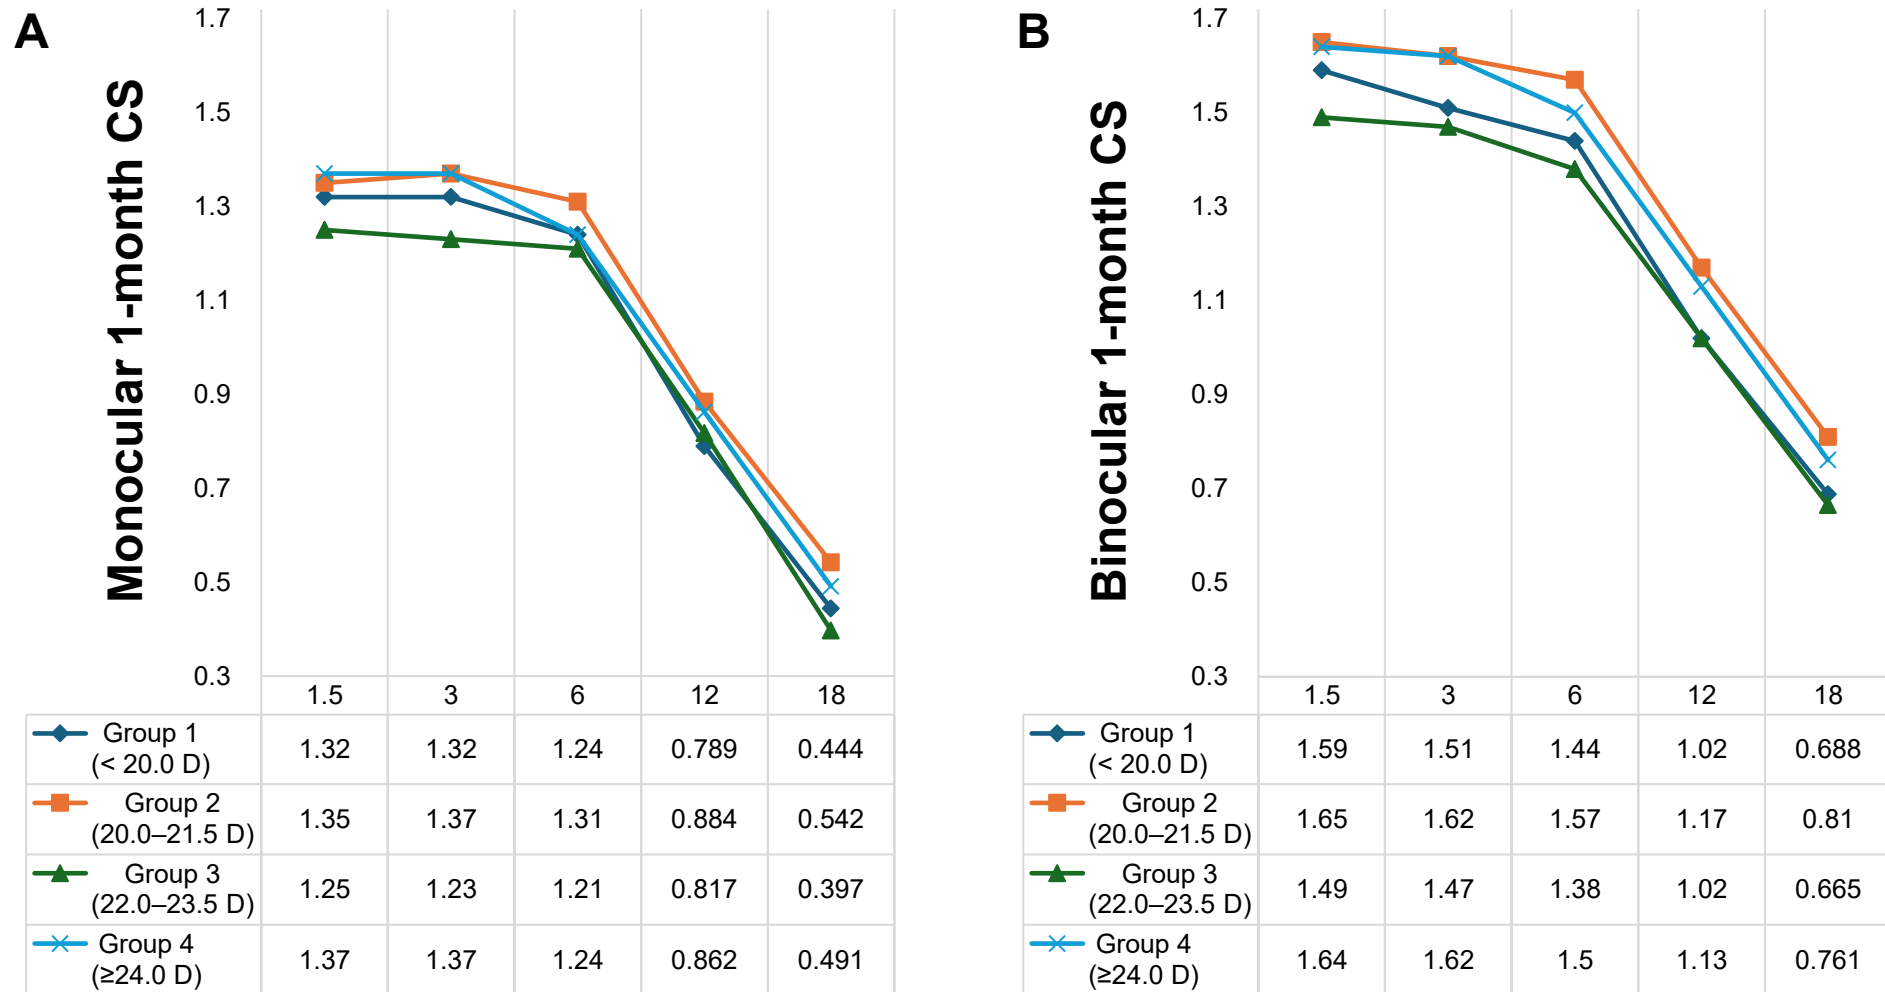

**Supplementary Figure 2. Photopic contrast sensitivity at 1 month post-surgery.** Mean monocular (left) and binocular (right) photopic contrast sensitivity (logCS) at spatial frequencies of 1.5, 3, 6, 12, and 18 cycles per degree (cpd). No significant inter-group differences were observed at any spatial frequency (all  $p > 0.05$  by generalized estimating equations [GEE]).

## Supplementary Table 1

**Supplementary Table 1.** Partial correlation coefficients ( $r$ ) between pupil size and key visual outcomes, controlling for age and gender

| 3 months          |         | Group 1<br>( $< 20.0$ D) | Group 2<br>( $20.0$ – $21.5$ D) | Group 3<br>( $22.0$ – $23.5$ D) | Group 4<br>( $\geq 24.0$ D) | Total   |
|-------------------|---------|--------------------------|---------------------------------|---------------------------------|-----------------------------|---------|
| SA (RMS)          |         | -0.4340                  | 0.0550                          | -0.1170                         | 0.0300                      | -0.0220 |
| Coma H (RMS)      |         | 0.1530                   | -0.1850                         | -0.0020                         | -0.0220                     | -0.0600 |
| Coma V (RMS)      |         | -0.2810                  | -0.1460                         | -0.2880                         | 0.2870                      | -0.0940 |
| UDVA (logMAR)     |         | 0.2160                   | 0.1320                          | 0.2160                          | 0.1850                      | 0.1840  |
| 1 month           |         | Group 1<br>( $< 20.0$ D) | Group 2<br>( $20.0$ – $21.5$ D) | Group 3<br>( $22.0$ – $23.5$ D) | Group 4<br>( $\geq 24.0$ D) | Total   |
| CS<br>(monocular) | (cpd)   |                          |                                 |                                 |                             |         |
|                   | 1.5     | 0.0800                   | -0.2370                         | -0.1670                         | 0.1180                      | -0.1060 |
|                   | 3       | 0.0480                   | -0.1180                         | -0.2760                         | 0.2930                      | -0.0460 |
|                   | 6       | 0.0650                   | -0.0910                         | -0.2310                         | 0.1980                      | -0.0450 |
|                   | 12      | 0.0160                   | -0.0950                         | 0.0030                          | 0.2500                      | -0.0090 |
| 18                | 0.1340  | 0.0450                   | -0.2050                         | 0.0140                          | -0.0010                     |         |
| CS<br>(binocular) | (cpd)   |                          |                                 |                                 |                             |         |
|                   | 1.5     | 0.0990                   | -0.2820                         | -0.0510                         | 0.3880                      | -0.0590 |
|                   | 3       | 0.1410                   | -0.0940                         | -0.1050                         | 0.3960                      | 0.0040  |
|                   | 6       | 0.2980                   | 0.0120                          | -0.2320                         | 0.0490                      | -0.0030 |
|                   | 12      | 0.2810                   | 0.1020                          | 0.0180                          | 0.3370                      | 0.1280  |
| 18                | -0.0030 | -0.0040                  | -0.1300                         | 0.1710                          | -0.0070                     |         |

Note: Partial correlation coefficients ( $r$ ) between pupil size and spherical aberration (SA), coma (vertical/horizontal), uncorrected distance visual acuity (UDVA), and contrast sensitivity (CS). HOA and UDVA data are from 3-month measurements; CS data are from 1-month measurements. All analyses controlled for age and gender. No significant correlations were observed (all  $|r| < 0.3$ ,  $p > 0.05$ ). RMS, root mean square; logMAR, logarithm of the minimum angle of resolution; cpd, cycles per degree; D, diopters.
